# Supplementary material for: Characterization of the Subgingival Cultivable Microbiota in Patients with Different Stages of Periodontitis in Spain and Colombia. A Cross-Sectional Study
Source: MDPI journal article supplement (doi:10.3390/microorganisms9091940), 2021-09-12
Supplement: s1 [file s1]

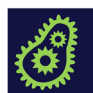

Article

# Characterization of the Subgingival Cultivable Microbiota in Patients with Different Stages of Periodontitis in Spain and Colombia. A Cross-Sectional Study

Roquelina Pianeta <sup>1,2</sup>, Margarita Iniesta <sup>1,\*</sup>, Diana Marcela Castillo <sup>3</sup>, Gloria I. Lafaurie <sup>3</sup>, Mariano Sanz <sup>1</sup> and David Herrera <sup>1</sup>

<sup>1</sup> ETEP (Etiology and Therapy of Periodontal and Peri-implant Diseases) Research Group, Faculty of Odontology, University Complutense of Madrid (UCM), 28040 Madrid, Spain; rpianeta@ucm.es (R.P.); marsan@ucm.es (M.S.); davidher@ucm.es (D.H.)

<sup>2</sup> School of Dentistry, Corporación Universitaria Rafael Núñez (CURN), Cartagena 10003, Colombia

<sup>3</sup> Unit of Basic Oral Investigation (UIBO), School of Dentistry, Universidad El Bosque (UEB), Bogotá 110121, Colombia; castillodiana@unbosque.edu.co (D.M.C.); lafauriegloria@unbosque.edu.co (G.I.L.)

\* Correspondence: margaini@ucm.es

**Citation:** Pianeta, R.; Iniesta, M.; Castillo, D.M.; Lafaurie, G.I.; Sanz, M.; Herrera, D. Characterization of the Subgingival Microbiota in Patients with Different Stages of Periodontitis in Spain and Colombia. A Cross-Sectional Study. *Microorganisms* **2021**, *9*, 1940. <https://doi.org/10.3390/microorganisms9091940>

Academic Editor: Martin Von Bergen

Received: 28 July 2021

Accepted: 11 September 2021

Published: 12 September 2021

**Publisher's Note:** MDPI stays neutral with regard to jurisdictional claims in published maps and institutional affiliations.

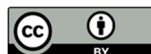

**Copyright:** © 2021 by the authors. Licensee MDPI, Basel, Switzerland. This article is an open access article distributed under the terms and conditions of the Creative Commons Attribution (CC BY) license (<http://creativecommons.org/licenses/by/4.0/>).

**Table S1.** Distribution of periodontitis grades by country.

|       |                     | Spain |      | Colombia |      | Second comparison<br>(between countries <sup>a</sup> ) |                   |
|-------|---------------------|-------|------|----------|------|--------------------------------------------------------|-------------------|
|       | First<br>comparison | n     | %    | n        | %    | <i>p</i><br>value                                      | <i>p</i><br>value |
| Grade | A                   | 8     | 13.3 | 7        | 11.9 | 1.000                                                  | 1.000             |
|       | B                   | 24    | 40.0 | 26       | 44.1 |                                                        |                   |
|       | C                   | 28    | 46.7 | 26       | 44.1 |                                                        |                   |

n, number of patients; %, percentage. <sup>a</sup>, Chi-square test with Bonferroni correction.

Periodontitis grades:

Indirect estimation was made using bone loss as a function of age at the most affected tooth or case presentation (radiographic bone loss (RBL) expressed as percentage of root length divided by the age of the subject, RBL/age):

- Periodontitis in grade A. Percentage of RBL / age <0.25, non-smoker.
- Periodontitis in grade B. Percentage of RBL / age 0.25 to 1.0, smoker <10 cigarettes/day.
- Periodontitis in grade C. Percentage of RBL / age >1.0, smoker ≥10 cigarettes/day.

**Table S2.** Clinical characteristics of the selected sites for subgingival sampling.

|                 |          | Health and Gingivitis |               |                                | Periodontitis I-II |               |                                | Periodontitis III-IV |               |                                |
|-----------------|----------|-----------------------|---------------|--------------------------------|--------------------|---------------|--------------------------------|----------------------|---------------|--------------------------------|
|                 |          | n                     | Mean (SD)     | <i>p</i><br>value <sup>a</sup> | n                  | Mean (SD)     | <i>p</i><br>value <sup>a</sup> | n                    | Mean (SD)     | <i>p</i><br>value <sup>a</sup> |
| <b>PD (mm)</b>  | Spain    | 30                    | 2.79 (0.39)   | 0.271                          | 30                 | 4.43 (0.69)   | 0.203                          | 30                   | 6.10 (1.29)   | 0.280                          |
|                 | Colombia | 18                    | 2.66 (0.33)   |                                | 23                 | 4.71 (0.91)   |                                | 36                   | 5.79 (1.01)   |                                |
| <b>CAL (mm)</b> | Spain    | 30                    | 0             | 1.000                          | 30                 | 4.09 (0.31)   | 0.411                          | 30                   | 6.47 (1.31)   | 0.824                          |
|                 | Colombia | 18                    | 0             |                                | 23                 | 3.92 (1.05)   |                                | 36                   | 6.39 (1.52)   |                                |
| <b>BoP (%)</b>  | Spain    | 30                    | 36.66 (40.86) | 0.060                          | 30                 | 87.50 (21.52) | 0.111                          | 30                   | 95.00 (13.77) | 0.158                          |
|                 | Colombia | 18                    | 15.27 (29.87) |                                | 23                 | 95.65 (12.27) |                                | 36                   | 98.61 (5.80)  |                                |
| <b>PII (%)</b>  | Spain    | 30                    | 55.00 (32.43) | <0.001                         | 30                 | 80.00 (28.16) | 0.126                          | 30                   | 93.33 (15.99) | 0.070                          |
|                 | Colombia | 18                    | 9.72 (22.91)  |                                | 23                 | 91.30 (23.36) |                                | 36                   | 98.61 (5.80)  |                                |

Probing depth (PD); clinical attachment level (CAL); bleeding on probing (BoP); plaque index (PII). SD, standard deviation; n, number of patients.

<sup>a</sup>, Student t test.

**Table S3.** Mean and standard deviation (SD) and median and interquartile range (IR) of counts (log transformed), proportions and frequencies of detection of target bacterial species according to country, in periodontitis in stages I-II patients. Counts and proportions were calculated considering all samples.

| Periodontitis I-II               |          |                     |             |             |                |                          |               |               |                |                        |                |
|----------------------------------|----------|---------------------|-------------|-------------|----------------|--------------------------|---------------|---------------|----------------|------------------------|----------------|
|                                  | Country  | Counts <sup>a</sup> |             |             |                | Proportions <sup>a</sup> |               |               |                | Frequency <sup>b</sup> |                |
|                                  |          | n                   | Mean (SD)   | Median (IR) | <i>p</i> value | n                        | Mean (SD)     | Median (IR)   | <i>p</i> value | n (%)                  | <i>p</i> value |
| <i>Porphyromonas gingivalis</i>  | Spain    | 30                  | 5.07 (1.20) | 5.05 (0.92) | 0.161          | 30                       | 13.89 (18.78) | 7.27 (14.33)  | 0.068          | 29 (96.7)              | <0.001         |
|                                  | Colombia | 23                  | 2.95 (3.22) | 0.00 (6.26) |                | 23                       | 15.45 (23.32) | 0.00 (36.00)  |                | 11 (47.8)              |                |
| <i>Prevotella intermedia</i>     | Spain    | 30                  | 4.15 (1.41) | 4.32 (1.57) | 0.238          | 30                       | 2.32 (4.16)   | 0.82 (2.34)   | 0.189          | 28 (93.3)              | 0.014          |
|                                  | Colombia | 23                  | 3.70 (2.79) | 5.30 (5.78) |                | 23                       | 8.43 (11.19)  | 5.06 (12.50)  |                | 15 (65.2)              |                |
| <i>Tannerella forsythia</i>      | Spain    | 30                  | 1.39 (2.18) | 0.00 (4.30) | 0.184          | 30                       | 0.39 (0.79)   | 0.00 (0.67)   | 0.251          | 9 (30.0)               | 0.487          |
|                                  | Colombia | 23                  | 2.15 (2.76) | 0.00 (5.26) |                | 23                       | 1.54 (2.58)   | 0.00 (2.86)   |                | 9 (39.1)               |                |
| <i>Parvimonas micra</i>          | Spain    | 30                  | 0.32 (1.22) | 0.00 (0.00) | 0.001          | 30                       | 0.49 (2.64)   | 0.00 (0.00)   | 0.002          | 2 (6.7)                | 0.002          |
|                                  | Colombia | 23                  | 2.32 (2.73) | 0.00 (5.30) |                | 23                       | 2.96 (5.23)   | 0.00 (4.69)   |                | 10 (43.5)              |                |
| <i>Fusobacterium nucleatum</i>   | Spain    | 30                  | 4.21 (1.75) | 4.69 (0.98) | 0.008          | 30                       | 2.52 (2.86)   | 1.99 (3.02)   | 0.004          | 26 (86.7)              | 0.687          |
|                                  | Colombia | 23                  | 4.94 (1.68) | 5.34 (1.12) |                | 23                       | 7.46 (6.85)   | 6.69 (9.70)   |                | 21 (91.3)              |                |
| <i>Campylobacter rectus</i>      | Spain    | 30                  | 0.35 (1.36) | 0.00 (0.00) | 0.211          | 30                       | 0.94 (4.54)   | 0.00 (0.00)   | 0.211          | 2 (6.7)                | 0.499          |
|                                  | Colombia | 23                  | 0           | 0           |                | 23                       | 0             | 0             |                | 0 (0.0)                |                |
| <i>Eikenella corrodens</i>       | Spain    | 30                  | 0.66 (1.51) | 0.00 (0.00) | 0.042          | 30                       | 0.14 (0.48)   | 0.00 (0.00)   | 0.042          | 5 (16.7)               | 0.061          |
|                                  | Colombia | 23                  | 0           | 0           |                | 23                       | 0             | 0             |                | 0 (0.0)                |                |
| <i>Capnocytophaga spp.</i>       | Spain    | 30                  | 0.78 (1.80) | 0.00 (0.00) | <0.001         | 30                       | 0.13 (0.36)   | 0.00 (0.00)   | <0.001         | 5 (16.7)               | <0.001         |
|                                  | Colombia | 23                  | 4.85 (2.02) | 5.47 (1.30) |                | 23                       | 11.21 (15.02) | 6.12 (11.97)  |                | 20 (87.0)              |                |
| <i>Actinomyces odontolyticus</i> | Spain    | 30                  | 0           | 0           | <0.001         | 30                       | 0             | 0             | <0.001         | 0 (0.0)                | <0.001         |
|                                  | Colombia | 23                  | 4.94 (2.07) | 5.63 (1.34) |                | 23                       | 13.42 (11.32) | 13.86 (16.80) |                | 20 (87.0)              |                |

n, number of patients; n (%), number and percentage of positive samples. <sup>a</sup>, Mann-Whitney test. <sup>b</sup>, Chi-square test.

**Table S4.** Mean and standard deviation (SD) and median and interquartile range (IR) of counts (log transformed), proportions and frequencies of detection of target bacterial species according to country, in periodontitis in stages III-IV patients. Counts and proportions were calculated considering all samples.

| Periodontitis III-IV             |          |                     |             |             |                |                          |               |               |                |                        |                |
|----------------------------------|----------|---------------------|-------------|-------------|----------------|--------------------------|---------------|---------------|----------------|------------------------|----------------|
|                                  | Country  | Counts <sup>a</sup> |             |             |                | Proportions <sup>a</sup> |               |               |                | Frequency <sup>b</sup> |                |
|                                  |          | n                   | Mean (SD)   | Median (IR) | <i>p</i> value | n                        | Mean (SD)     | Median (IR)   | <i>p</i> value | n (%)                  | <i>p</i> value |
| <i>Porphyromonas gingivalis</i>  | Spain    | 30                  | 5.34 (1.94) | 5.97 (1.34) | <0.001         | 30                       | 18.27 (17.98) | 13.72 (25.91) | <0.001         | 27 (90.0)              | <0.001         |
|                                  | Colombia | 36                  | 1.74 (2.69) | 0.00 (5.00) |                | 36                       | 3.63 (7.38)   | 0.00 (3.70)   |                | 11 (30.6)              |                |
| <i>Prevotella intermedia</i>     | Spain    | 30                  | 4.27 (2.09) | 5.00 (1.99) | 0.736          | 30                       | 5.09 (8.45)   | 1.65 (3.84)   | 0.263          | 25 (83.3)              | 0.410          |
|                                  | Colombia | 36                  | 4.09 (2.48) | 5.20 (4.83) |                | 36                       | 8.87 (11.36)  | 3.53 (13.90)  |                | 27 (75.0)              |                |
| <i>Tannerella forsythia</i>      | Spain    | 30                  | 2.11 (2.48) | 0.00 (4.68) | 0.515          | 30                       | 0.80 (1.73)   | 0.00 (0.89)   | 0.638          | 13 (43.3)              | 0.283          |
|                                  | Colombia | 36                  | 1.60 (2.47) | 0.00 (4.94) |                | 36                       | 0.94 (1.81)   | 0.00 (1.21)   |                | 11 (30.6)              |                |
| <i>Parvimonas micra</i>          | Spain    | 30                  | 0.48 (1.48) | 0.00 (0.00) | 0.885          | 30                       | 0.09 (0.37)   | 0.00 (0.00)   | 0.772          | 3 (10.0)               | 1.000          |
|                                  | Colombia | 36                  | 0.56 (1.63) | 0.00 (0.00) |                | 36                       | 0.97 (3.39)   | 0.00 (0.00)   |                | 4 (11.1)               |                |
| <i>Fusobacterium nucleatum</i>   | Spain    | 30                  | 4.25 (1.69) | 4.77 (1.00) | 0.012          | 30                       | 1.68 (1.63)   | 0.99 (2.30)   | <0.001         | 27 (90.0)              | 0.719          |
|                                  | Colombia | 36                  | 4.79 (2.07) | 5.42 (1.29) |                | 36                       | 13.72 (16.47) | 8.76 (21.59)  |                | 31 (86.1)              |                |
| <i>Campylobacter rectus</i>      | Spain    | 30                  | 0.45 (1.37) | 0.00 (0.00) | 0.054          | 30                       | 0.17 (0.54)   | 0.00 (0.00)   | 0.054          | 3 (10.0)               | 0.089          |
|                                  | Colombia | 36                  | 0           | 0           |                | 36                       | 0             | 0             |                | 0 (0.0)                |                |
| <i>Eikenella corrodens</i>       | Spain    | 30                  | 0.68 (1.79) | 0.00 (0.00) | 0.296          | 30                       | 0.35 (1.18)   | 0.00 (0.00)   | 0.326          | 4 (13.3)               | 0.399          |
|                                  | Colombia | 36                  | 0.30 (1.27) | 0.00 (0.00) |                | 36                       | 0.53 (2.28)   | 0.00 (0.00)   |                | 2 (5.6)                |                |
| <i>Capnocytophaga</i> spp.       | Spain    | 30                  | 1.02 (1.90) | 0.00 (0.90) | <0.001         | 30                       | 0.10 (0.20)   | 0.00 (0.05)   | <0.001         | 7 (23.3)               | 0.001          |
|                                  | Colombia | 36                  | 3.39 (2.65) | 5.00 (5.42) |                | 36                       | 7.51 (14.42)  | 1.71 (8.54)   |                | 23 (63.9)              |                |
| <i>Actinomyces odontolyticus</i> | Spain    | 30                  | 0           | 0           | <0.001         | 30                       | 0             | 0             | <0.001         | 0 (0.0)                | <0.001         |
|                                  | Colombia | 36                  | 5.31 (1.52) | 5.60 (1.52) |                | 36                       | 19.23 (20.17) | 11.40 (26.99) |                | 34 (94.4)              |                |

n, number of patients; n (%), number and percentage of positive samples. <sup>a</sup>, Mann-Whitney test. <sup>b</sup>, Chi-square test.

**Table S5.** Mean and standard deviation (SD) and median and interquartile range (IR) of counts (log transformed), proportions and frequencies of detection of target bacterial species, according to country, in health and gingivitis subjects. Counts and proportions were calculated considering all samples.

| Health and Gingivitis            |          |                     |             |             |                |                          |               |               |                |                        |                |
|----------------------------------|----------|---------------------|-------------|-------------|----------------|--------------------------|---------------|---------------|----------------|------------------------|----------------|
|                                  | Country  | Counts <sup>a</sup> |             |             |                | Proportions <sup>a</sup> |               |               |                | Frequency <sup>b</sup> |                |
|                                  |          | n                   | Mean (SD)   | Median (IR) | <i>p</i> value | n                        | Mean (SD)     | Median (IR)   | <i>p</i> value | n (%)                  | <i>p</i> value |
| <i>Porphyromonas gingivalis</i>  | Spain    | 30                  | 2.62 (2.61) | 3.29 (5.42) | 0.444          | 30                       | 7.67 (14.42)  | 0.43 (10.28)  | 0.178          | 16 (53.3)              | 0.178          |
|                                  | Colombia | 18                  | 1.88 (2.76) | 0.00 (5.63) |                | 18                       | 2.90 (6.56)   | 0.00 (2.28)   |                | 6 (33.3)               |                |
| <i>Prevotella intermedia</i>     | Spain    | 30                  | 2.26 (2.24) | 2.23 (4.00) | <0.001         | 30                       | 2.05 (5.55)   | 0.03 (0.72)   | <0.001         | 17 (56.7)              | 0.001          |
|                                  | Colombia | 18                  | 5.68 (0.81) | 5.77 (1.18) |                | 18                       | 11.47 (9.64)  | 7.61 (12.89)  |                | 18 (100.0)             |                |
| <i>Tannerella forsythia</i>      | Spain    | 30                  | 0.72 (1.65) | 0.00 (0.00) | <0.001         | 30                       | 0.52 (2.12)   | 0.00 (0.00)   | <0.001         | 5 (16.7)               | <0.001         |
|                                  | Colombia | 18                  | 5.03 (1.92) | 5.77 (0.88) |                | 18                       | 9.38 (8.94)   | 6.75 (12.74)  |                | 16 (88.9)              |                |
| <i>Parvimonas micra</i>          | Spain    | 30                  | 0.45 (1.41) | 0.00 (0.00) | <0.001         | 30                       | 0.24 (0.79)   | 0.00 (0.00)   | <0.001         | 3 (10.0)               | <0.001         |
|                                  | Colombia | 18                  | 3.97 (2.59) | 5.26 (5.79) |                | 18                       | 5.84 (9.33)   | 3.35 (5.89)   |                | 13 (72.2)              |                |
| <i>Fusobacterium nucleatum</i>   | Spain    | 30                  | 4.03 (1.29) | 4.25 (1.03) | <0.001         | 30                       | 3.54 (3.63)   | 2.39 (3.40)   | 0.443          | 28 (93.3)              | 0.521          |
|                                  | Colombia | 18                  | 5.23 (0.65) | 5.25 (0.91) |                | 18                       | 3.78 (2.99)   | 2.73 (5.05)   |                | 18 (100)               |                |
| <i>Campylobacter rectus</i>      | Spain    | 30                  | 0.37 (1.14) | 0.00 (0.00) | 0.171          | 30                       | 0.29 (1.11)   | 0.00 (0.00)   | 0.171          | 3 (10.0)               | 0.282          |
|                                  | Colombia | 18                  | 0           | 0           |                | 18                       | 0             | 0             |                | 0 (0.0)                |                |
| <i>Eikenella corrodens</i>       | Spain    | 30                  | 0.64 (1.31) | 0.00 (0.00) | 0.134          | 30                       | 0.08 (0.23)   | 0.00 (0.00)   | 0.138          | 6 (20.0)               | 0.325          |
|                                  | Colombia | 18                  | 1.69 (2.49) | 0.00 (4.68) |                | 18                       | 0.80 (1.37)   | 0.00 (1.51)   |                | 6 (33.3)               |                |
| <i>Capnocytophaga spp.</i>       | Spain    | 30                  | 0.42 (1.28) | 0.00 (0.00) | <0.001         | 30                       | 0.23 (1.02)   | 0.00 (0.00)   | <0.001         | 3 (10.0)               | <0.001         |
|                                  | Colombia | 18                  | 5.59 (0.49) | 5.59 (0.78) |                | 18                       | 8.42 (8.00)   | 5.06 (7.39)   |                | 18 (100.0)             |                |
| <i>Actinomyces odontolyticus</i> | Spain    | 30                  | 0           | 0           | <0.001         | 30                       | 0             | 0             | <0.001         | 0 (0.00)               | <0.001         |
|                                  | Colombia | 18                  | 5.97 (0.60) | 5.99 (0.95) |                | 18                       | 18.54 (10.23) | 21.21 (15.54) |                | 18 (100.0)             |                |

n, number of patients; n (%), number and percentage of positive samples. <sup>a</sup>, Mann-Whitney test. <sup>b</sup>, Chi-square test.
